# Supplementary material
Source: PubMed Central journal article supplement (PMC3123870)

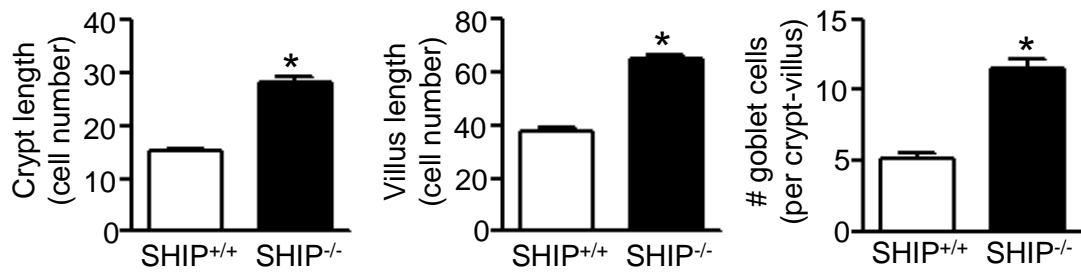

Supplemental Figure 1. McLarren *et al.*, 2011

Supplement: mmc1.pdf [file mmc1.pdf]

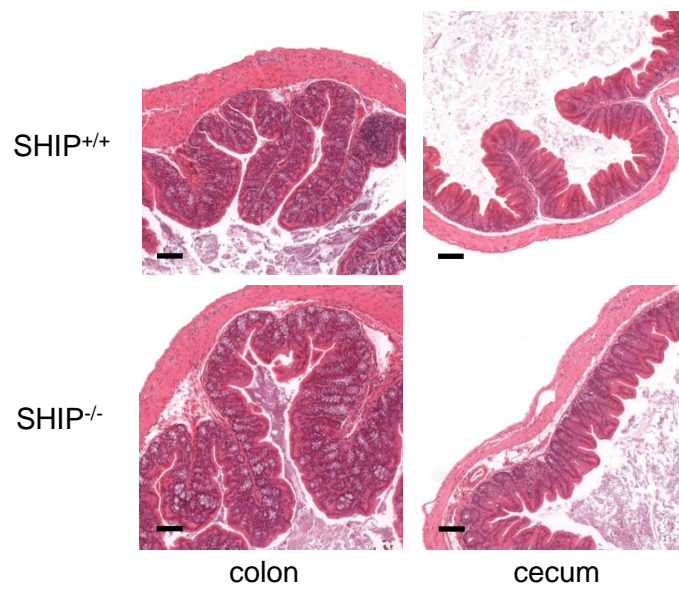

Supplemental Figure 2. McLarren *et al.*, 2011

Supplement: mmc2.pdf [file mmc2.pdf]

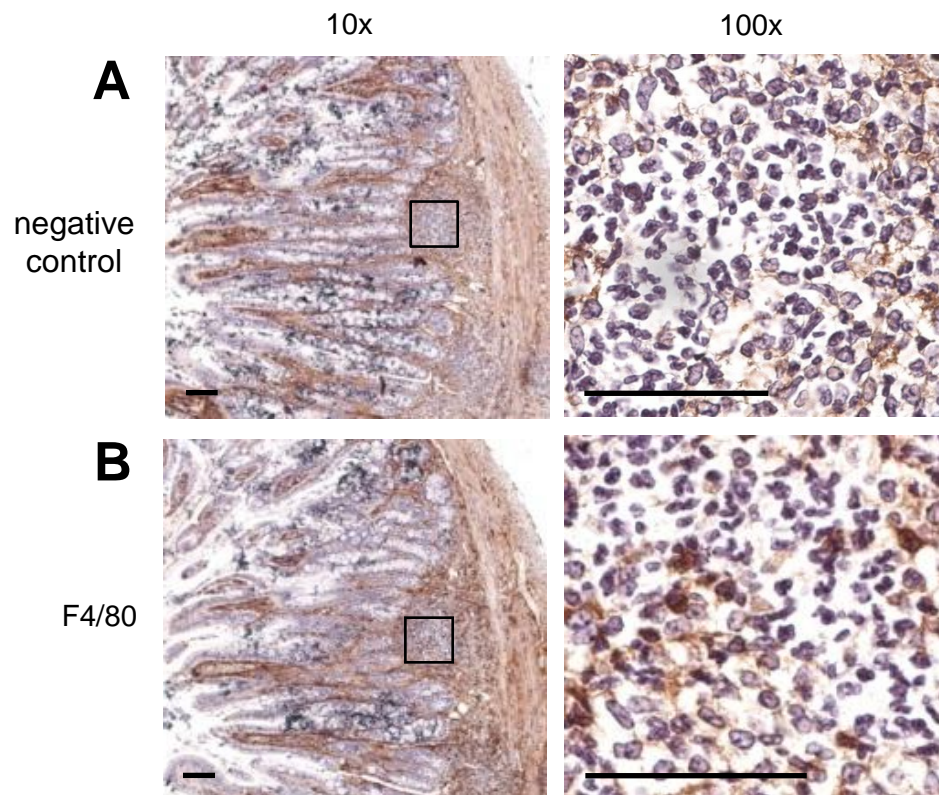

Supplemental Figure 3. McLarren *et al.*, 2011

Supplement: mmc3.pdf [file mmc3.pdf]

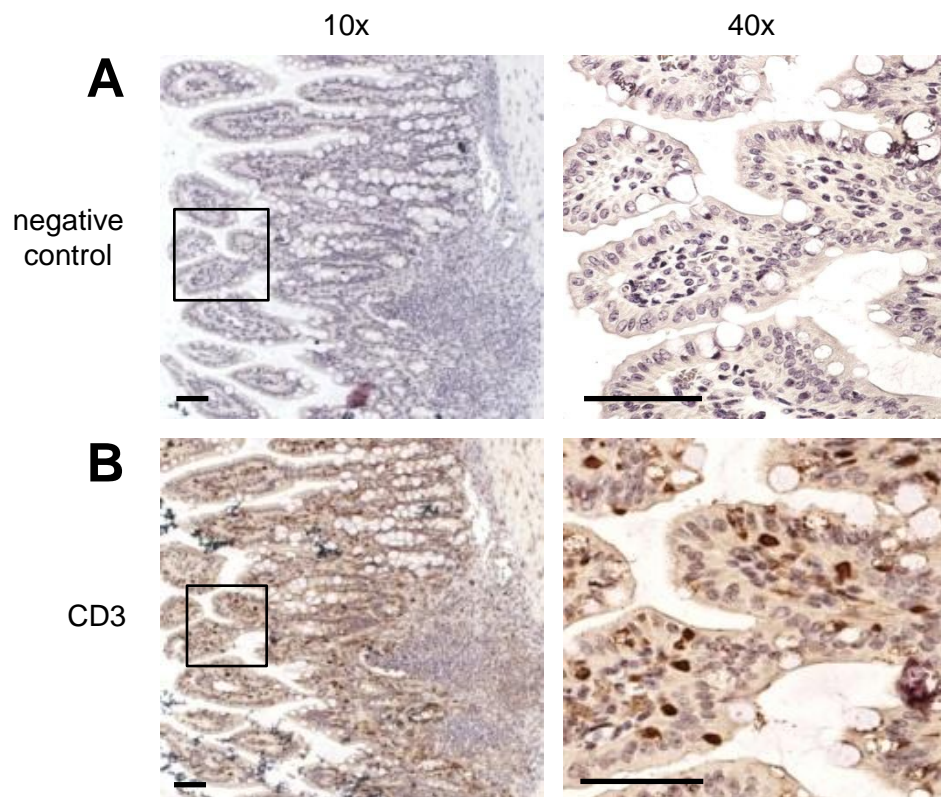

Supplemental Figure 4. McLarren *et al.*, 2011

Supplement: mmc4.pdf [file mmc4.pdf]
